# Supplementary material
Source: PubMed Central journal article supplement (PMC4293775)
Supplement: DS_10.1177_0022034514552825.pdf [file DS_10.1177_0022034514552825.pdf]

## RESEARCH REPORTS

### Biological

X.D. Wang<sup>1,2†</sup>, S.J. Cui<sup>1,2†</sup>, Y. Liu<sup>1,2</sup>, Q. Luo<sup>1,2</sup>,  
R.J. Du<sup>1,2</sup>, X.X. Kou<sup>1,2</sup>, J.N. Zhang<sup>1,2</sup>,  
Y.H. Zhou<sup>1,2\*</sup>, and Y.H. Gan<sup>3\*</sup>

<sup>1</sup>Department of Orthodontics, <sup>2</sup>Center for Craniofacial Stem Cell Research and Regeneration, and <sup>3</sup>Center for Temporomandibular Disorders and Orofacial Pain, Peking University School and Hospital of Stomatology, 22# Zhongguancun South Avenue, Haidian District, Beijing 100081, China; <sup>†</sup>authors contributing equally to this work; <sup>\*</sup>corresponding authors, yanhengzhou@gmail.com, kqyehuagan@bjmu.edu.cn

*J Dent Res* DOI: 10.1177/0022034514552825

# Deterioration of Mechanical Properties of Discs in Chronically Inflamed TMJ

## APPENDIX

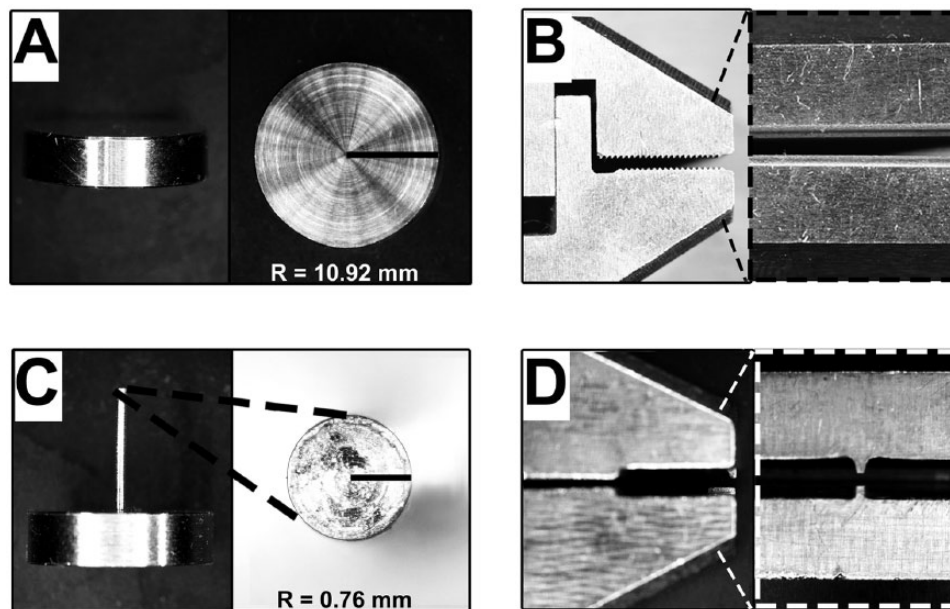

**Appendix Figure.** The details of indenter and clamping apparatus before and after modification. (A) Configuration of standard indenter from lateral and top views. The radius of the indenter was 10.92 mm. (B) Configuration of standard clamping apparatus from lateral and magnified views. (C) Configuration of modified indenter from lateral and top views. The radius of the indenter was 0.37 mm. (D) Configuration of modified clamping apparatus from lateral and magnified views.
